# Supplementary material for: Iron Oxide–Silica Core–Shell Nanoparticles Functionalized with Essential Oils for Antimicrobial Therapies
Source: MDPI journal article supplement (doi:10.3390/antibiotics10091138), 2021-09-21
Supplement: s1 [file s1]

## Supplementary Materials

### Iron Oxide-Silica Core-Shell Nanoparticles Functionalized with Essential Oils for Antimicrobial Therapies

Figures S1 and S2 represent the size distribution and the correlation graphs, respectively, for the samples synthesized through the co-precipitation method, i.e.,  $\text{Fe}_3\text{O}_4@\text{SiO}_2\_CP$ ,  $\text{Fe}_3\text{O}_4@\text{SiO}_2@\text{thyme\_CP}$ ,  $\text{Fe}_3\text{O}_4@\text{SiO}_2@\text{rosemary\_CP}$ , and  $\text{Fe}_3\text{O}_4@\text{SiO}_2@\text{basil\_CP}$ .

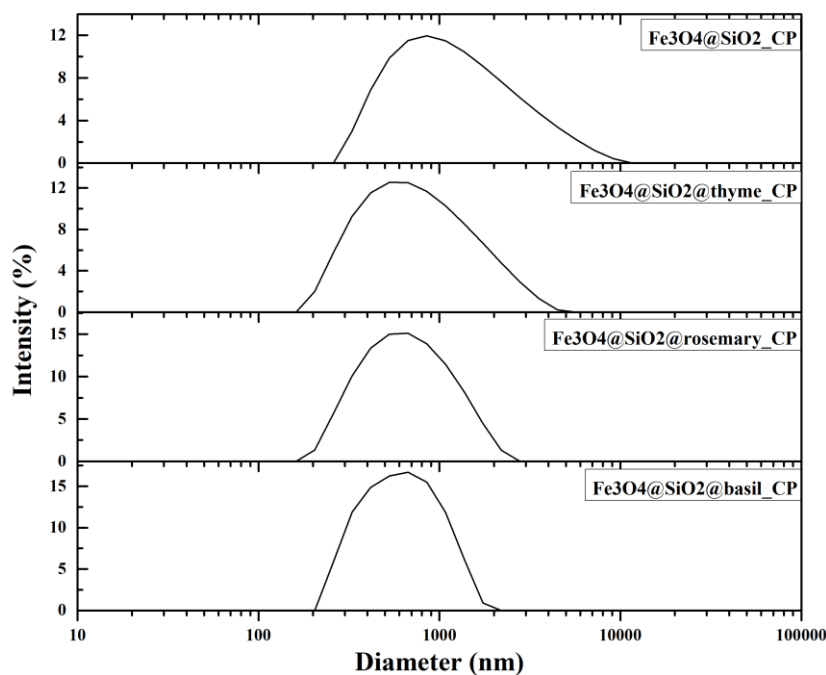

**Figure S1:** Size distribution for samples  $\text{Fe}_3\text{O}_4@\text{SiO}_2\_CP$ ,  $\text{Fe}_3\text{O}_4@\text{SiO}_2@\text{thyme\_CP}$ ,  $\text{Fe}_3\text{O}_4@\text{SiO}_2@\text{rosemary\_CP}$ , and  $\text{Fe}_3\text{O}_4@\text{SiO}_2@\text{basil\_CP}$ .

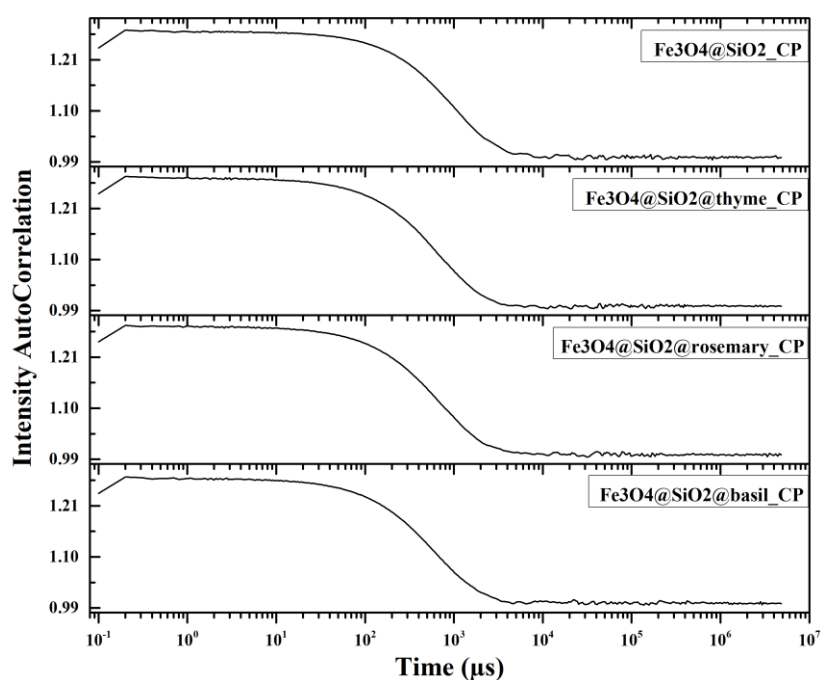

**Figure S2:** Correlation graphs for samples  $\text{Fe}_3\text{O}_4@\text{SiO}_2\text{-CP}$ ,  $\text{Fe}_3\text{O}_4@\text{SiO}_2@\text{thyme-CP}$ ,  $\text{Fe}_3\text{O}_4@\text{SiO}_2@\text{rosemary-CP}$ , and  $\text{Fe}_3\text{O}_4@\text{SiO}_2@\text{basil-CP}$ .

Figures 3 and 4 represent the size distribution and the correlation graphs, respectively, for the samples synthesized through the co-precipitation method, i.e.,  $\text{Fe}_3\text{O}_4@\text{SiO}_2\text{-SW}$ ,  $\text{Fe}_3\text{O}_4@\text{SiO}_2@\text{thyme-SW}$ ,  $\text{Fe}_3\text{O}_4@\text{SiO}_2@\text{rosemary-SW}$ , and  $\text{Fe}_3\text{O}_4@\text{SiO}_2@\text{basil-SW}$ .

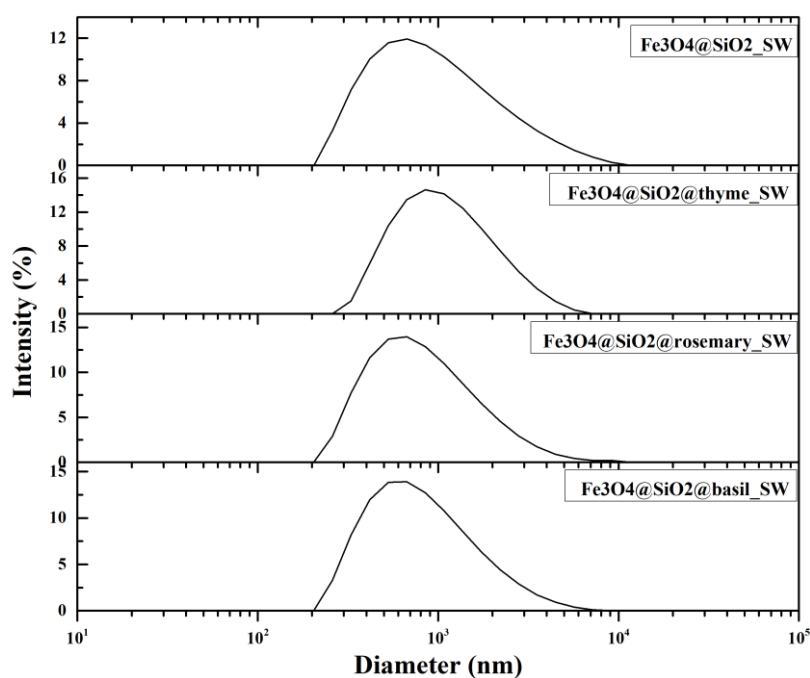

**Figure S3:** Size distribution for samples  $\text{Fe}_3\text{O}_4@\text{SiO}_2\text{-CP}$ ,  $\text{Fe}_3\text{O}_4@\text{SiO}_2@\text{thyme-CP}$ ,  $\text{Fe}_3\text{O}_4@\text{SiO}_2@\text{rosemary-CP}$ , and  $\text{Fe}_3\text{O}_4@\text{SiO}_2@\text{basil-CP}$ .

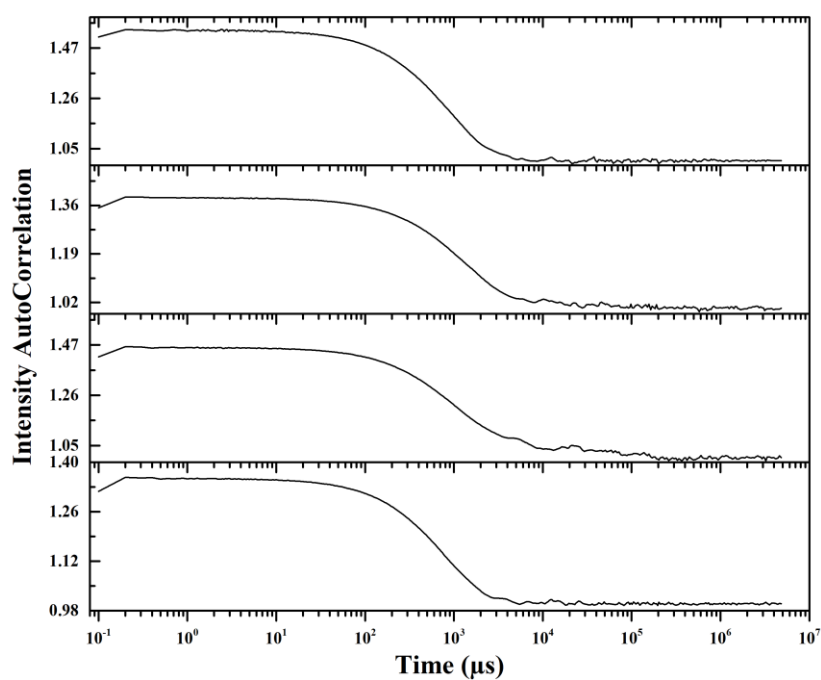

**Figure S4:** Correlation graphs for samples Fe<sub>3</sub>O<sub>4</sub>@SiO<sub>2</sub>\_CP, Fe<sub>3</sub>O<sub>4</sub>@SiO<sub>2</sub>@thyme\_CP, Fe<sub>3</sub>O<sub>4</sub>@SiO<sub>2</sub>@rosemary\_CP, and Fe<sub>3</sub>O<sub>4</sub>@SiO<sub>2</sub>@basil\_CP.

The compounds identified within EOs and their retention time were summarized in Table S1.

**Table S1:** The compounds identified within thyme, rosemary, and basil EOs, and their retention time.

| Sample      | Compound               | Retention time |
|-------------|------------------------|----------------|
| thyme EO    | $\alpha$ -pinene       | 9.467          |
|             | camphene               | 10.050         |
|             | sabinene               | 11.051         |
|             | $\beta$ -pinene        | 12.520         |
|             | $\alpha$ -phellandrene | 12.114         |
|             | 1,4-cineol             | 12.447         |
|             | p-mentha-1,5,8-triene  | 12.780         |
|             | d-limonene             | 12.978         |
|             | eucalyptol             | 13.083         |
|             | $\gamma$ -terpinene    | 14.052         |
|             | terpinolene            | 15.062         |
|             | linalool               | 15.656         |
|             | fenchol                | 16.323         |
|             | 1-terpineol            | 19.147         |
|             | endo-borneol           | 18.272         |
|             | 4-terpineol            | 18.595         |
|             | $\alpha$ -copaene      | 25.305         |
|             | caryophyllene          | 26.681         |
|             | m-camphorene           | 41.436         |
| rosemary EO | camphene               | 10.050         |
|             | fenchene               | 11.050         |
|             | $\beta$ -myrcene       | 11.509         |
|             | o-cymene               | 12.801         |
|             | eucalyptol             | 13.061         |
|             | 3-thujene              | 14.041         |
|             | linalool               | 15.604         |
|             | (+)-2-bornanone        | 17.323         |
|             | endo-borneol           | 18.261         |
|             | $\alpha$ -terpineol    | 19.095         |
|             | (-)-bornyl acetate     | 22.231         |
|             | $\alpha$ -copaene      | 25.305         |
|             | caryophyllene          | 26.722         |
|             | humulene               | 27.848         |
|             | caryophyllene oxide    | 31.641         |
| basil EO    | $\alpha$ -pinene       | 9.467          |

|                        |        |
|------------------------|--------|
| camphene               | 10.050 |
| sabinene               | 11.051 |
| $\beta$ -pinene        | 12.520 |
| $\alpha$ -phellandrene | 12.114 |
| 1,4-cineol             | 12.447 |
| p-mentha-1,5,8-triene  | 12.780 |
| d-limonene             | 12.978 |
| eucalyptol             | 13.083 |
| $\gamma$ -terpinene    | 14.052 |
| terpinolene            | 15.062 |
| linalool               | 15.656 |
| fenchol                | 16.323 |
| 1-terpineol            | 19.147 |
| endo-borneol           | 18.272 |
| 4-terpineol            | 18.595 |
| $\alpha$ -copaene      | 25.305 |
| caryophyllene          | 26.681 |
| m-camphorene           | 41.436 |

The chromatogram profiles for each EO and EOs-functionalized core-shell nanoparticles and the mass spectra for each of the major compounds identified within the EOs can be found in the Supplementary Material.

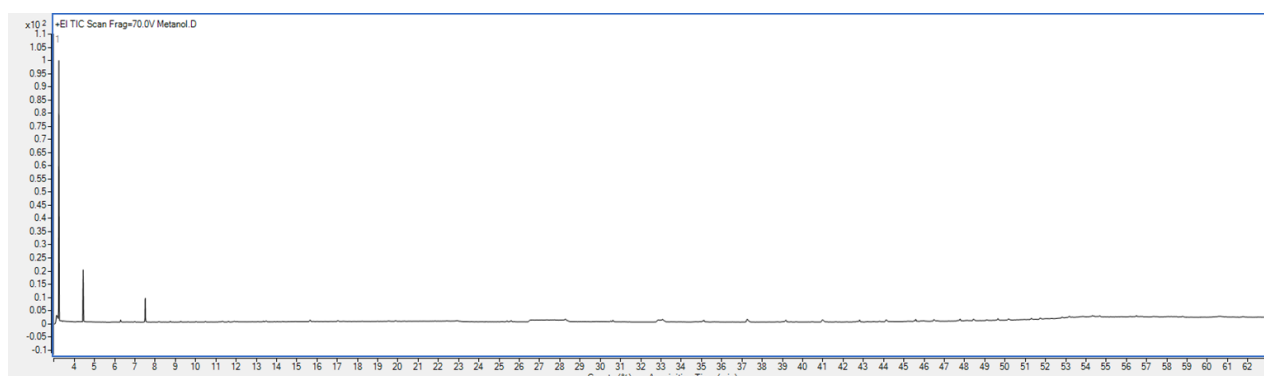

**Figure S5:** Chromatographic profile of the extraction solvent (methanol).

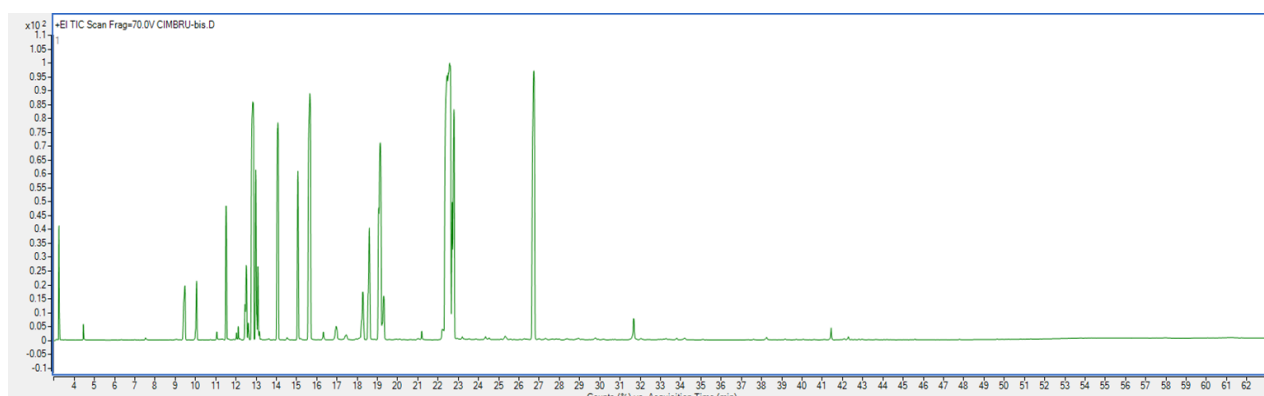

**Figure S6:** Chromatographic profile of the thyme EO.

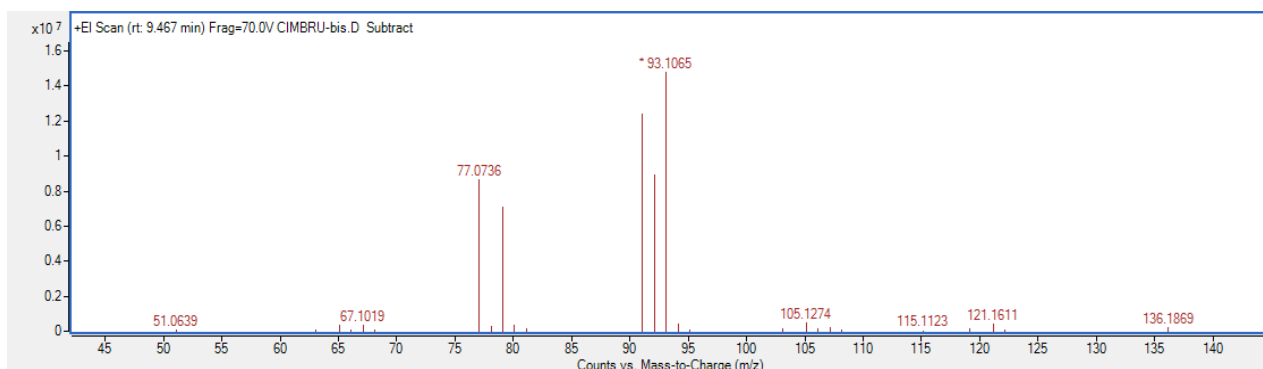

Figure S7.1: Mass spectrum for  $\alpha$ -pinene.

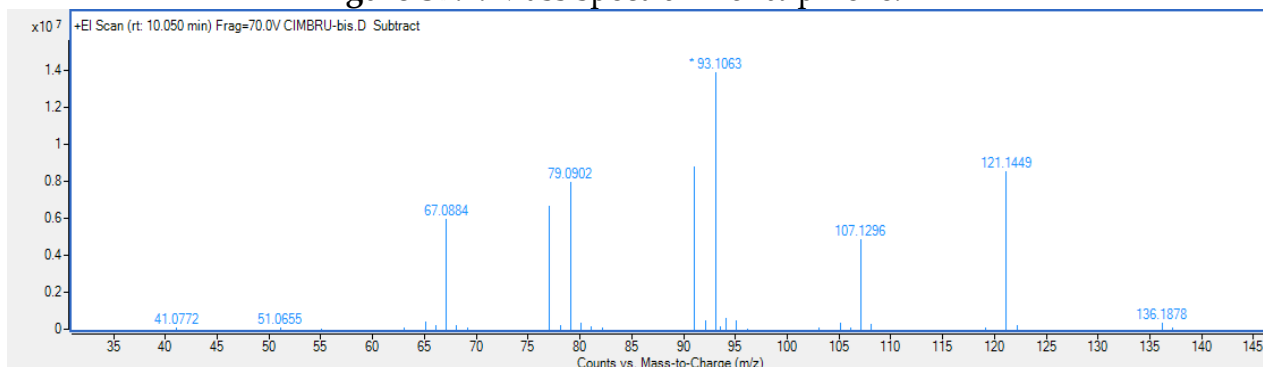

Figure S7.2: Mass spectrum for camphene.

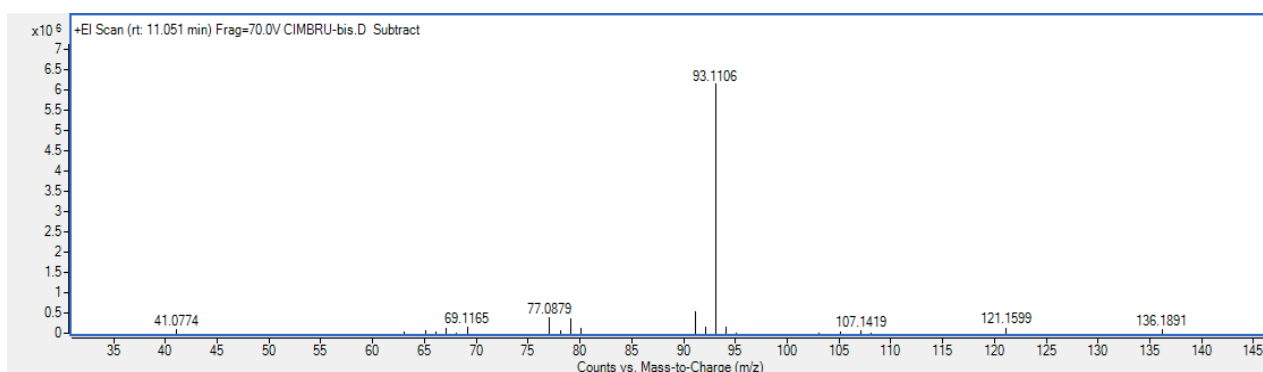

Figure S7.3: Mass spectrum for sabinene.

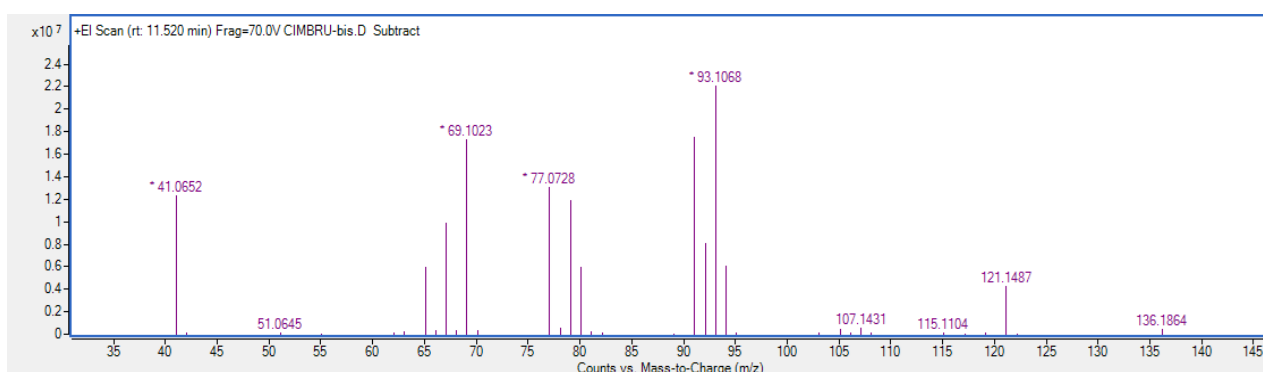

Figure S7.4: Mass spectrum for  $\beta$ -pinene.

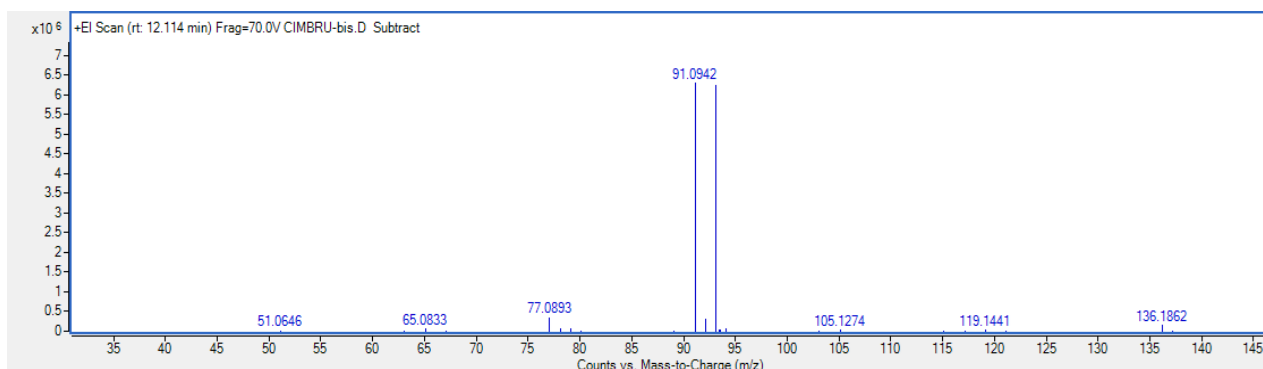

**Figure S7.5:** Mass spectrum for  $\alpha$ -phellandrene.

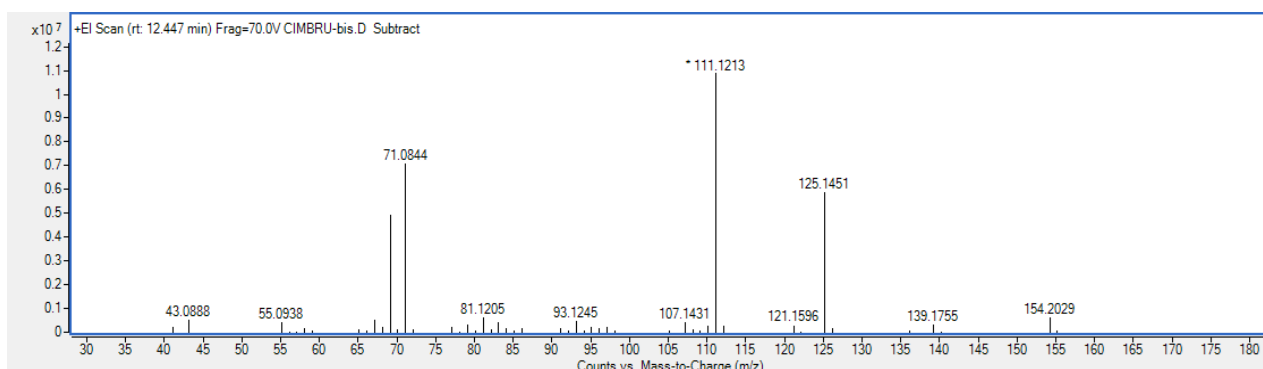

**Figure S7.6:** Mass spectrum for 1,4-cineol.

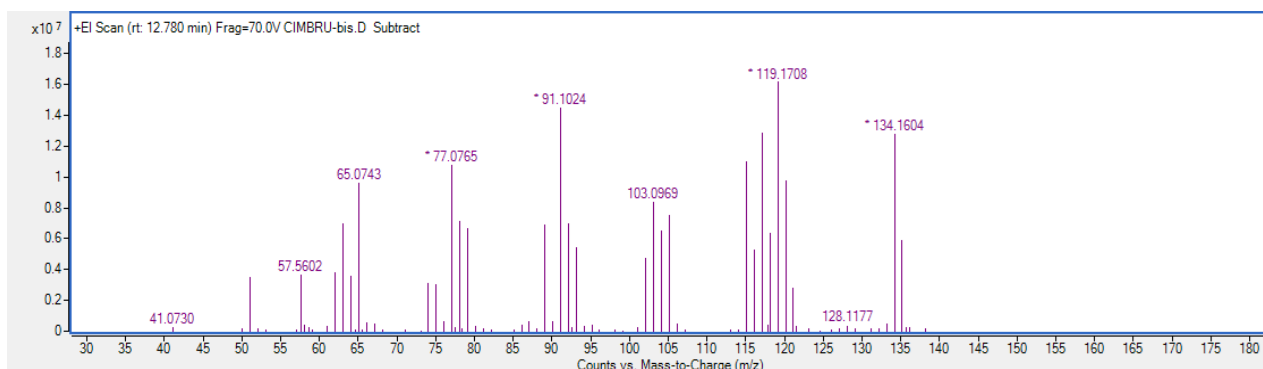

**Figure S7.7:** Mass spectrum for p-mentha-1,5,8-triene.

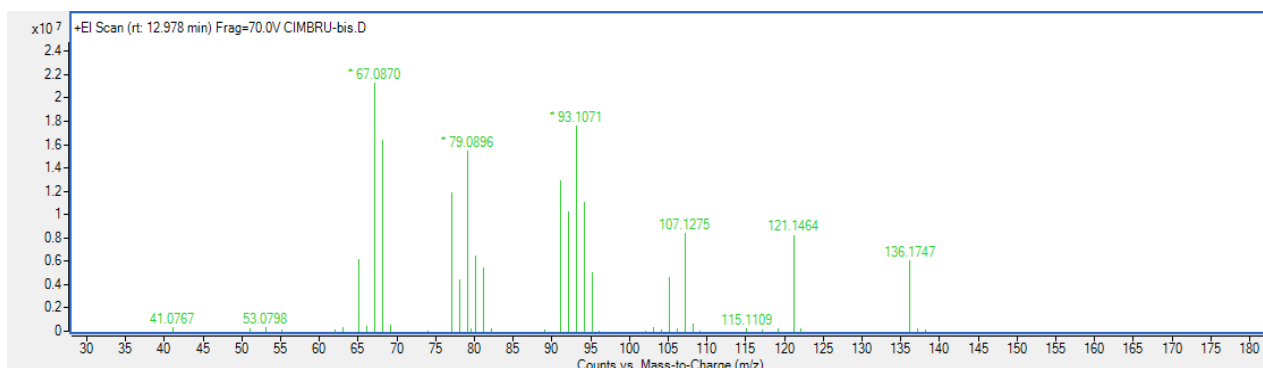

**Figure S7.8:** Mass spectrum for D-limonene.

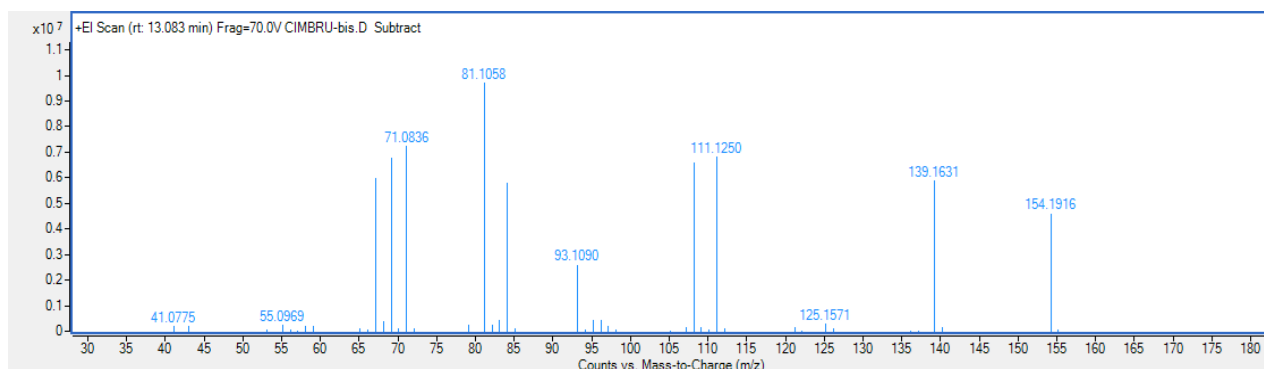

**Figure S7.9:** Mass spectrum for eucalyptol.

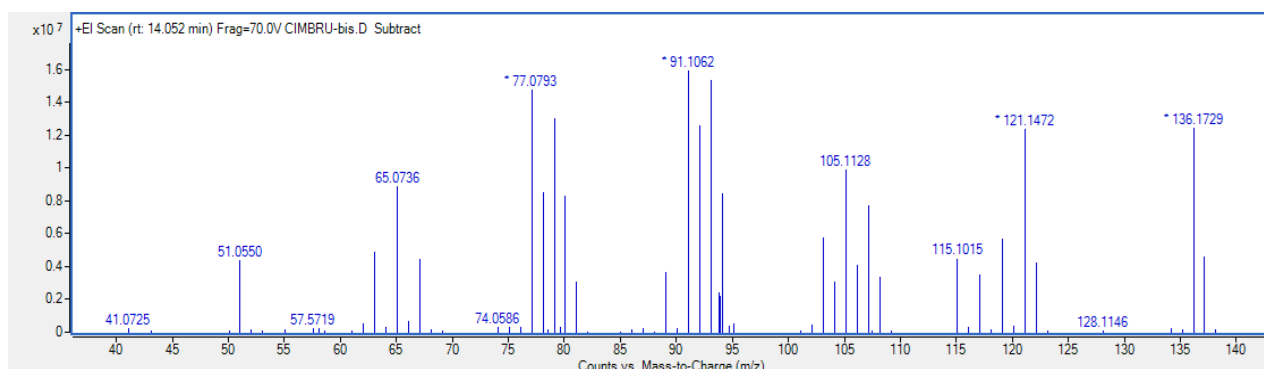

**Figure S7.10:** Mass spectrum for  $\gamma$ -terpinene.

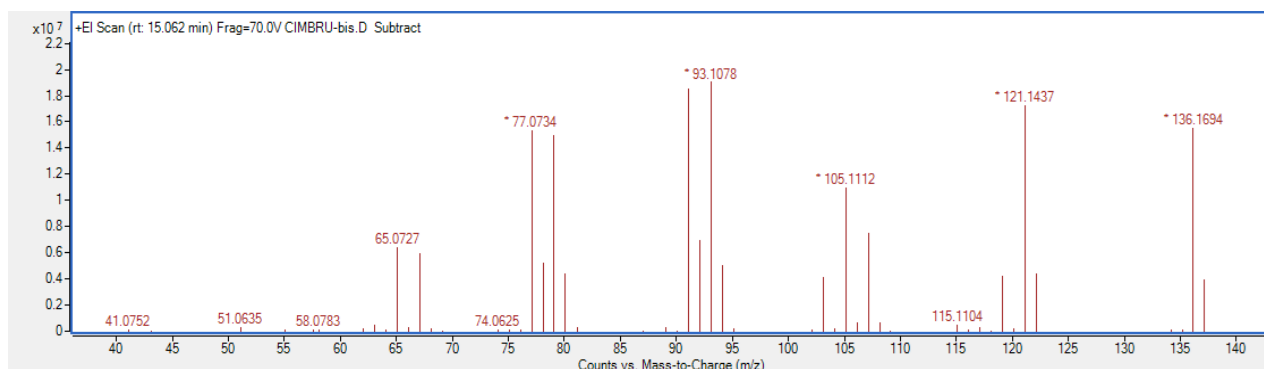

**Figure S7.11:** Mass spectrum for terpinolene.

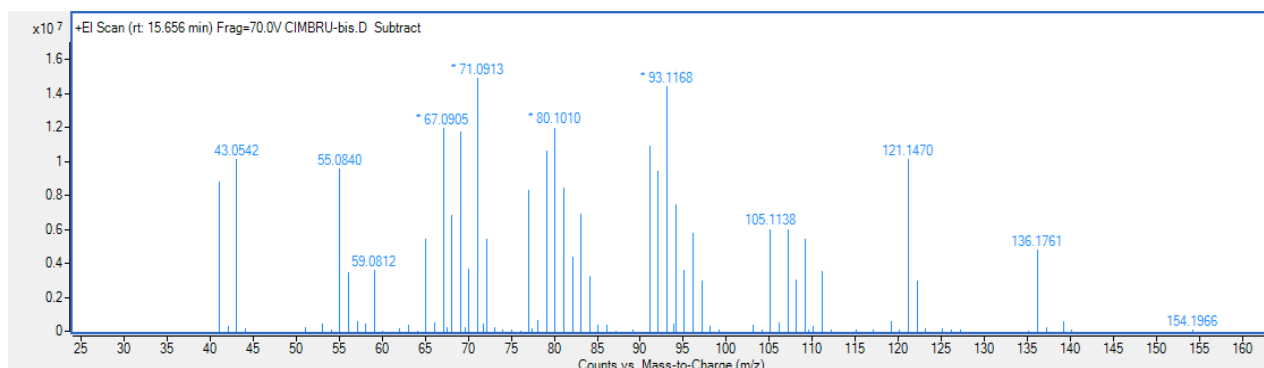

**Figure S7.12:** Mass spectrum for linalool.

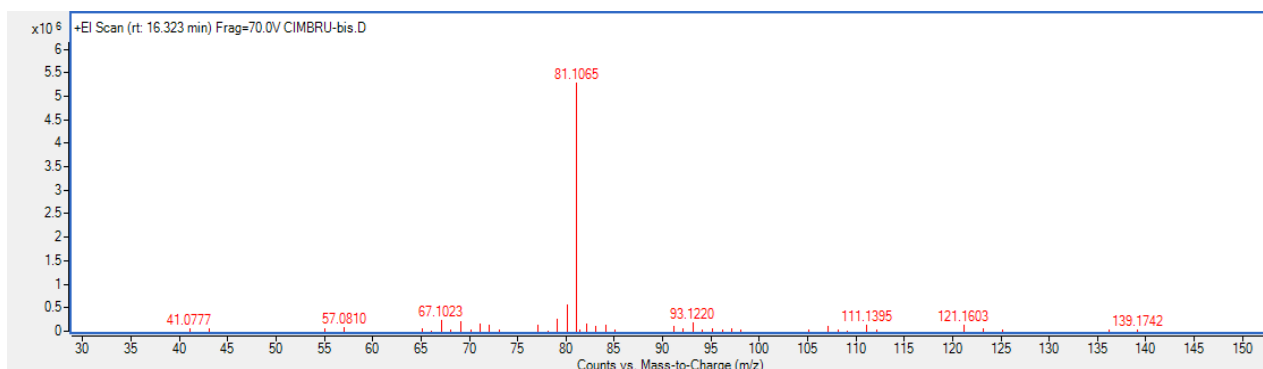

Figure S7.13: Mass spectrum for fenchol.

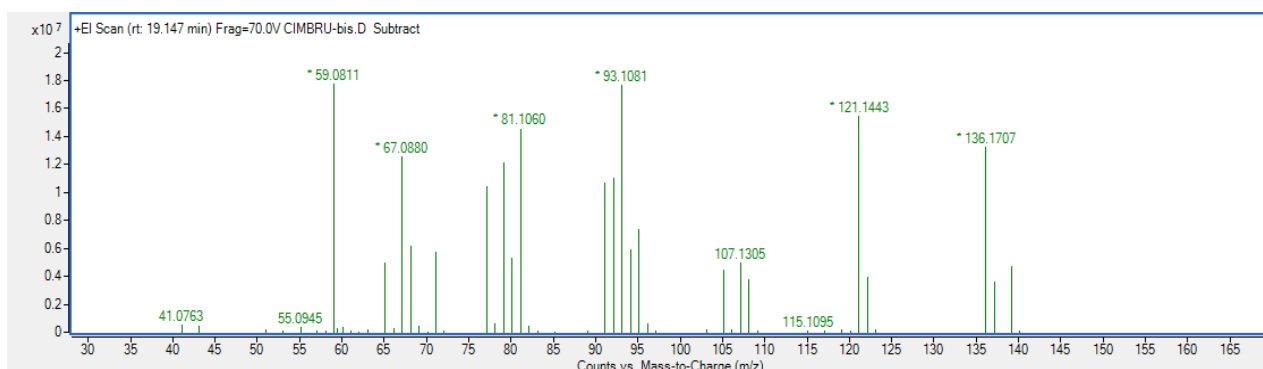

Figure S7.14: Mass spectrum for 1-terpineol.

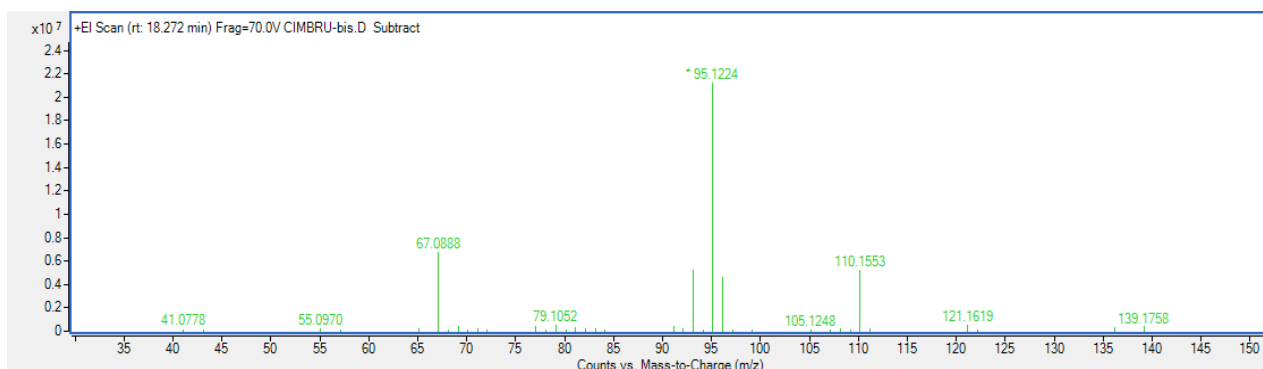

Figure S7.15: Mass spectrum for endo-borneol.

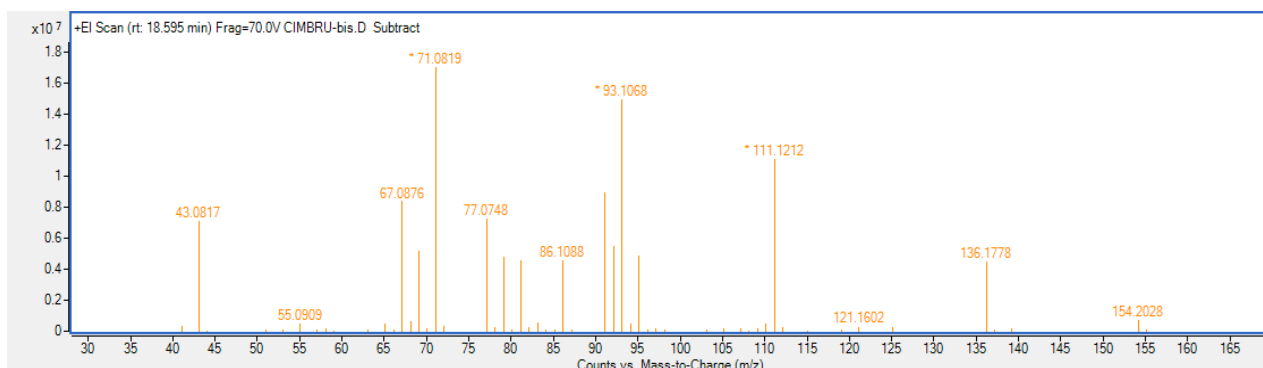

Figure S7.16: Mass spectrum for 4-terpineol.



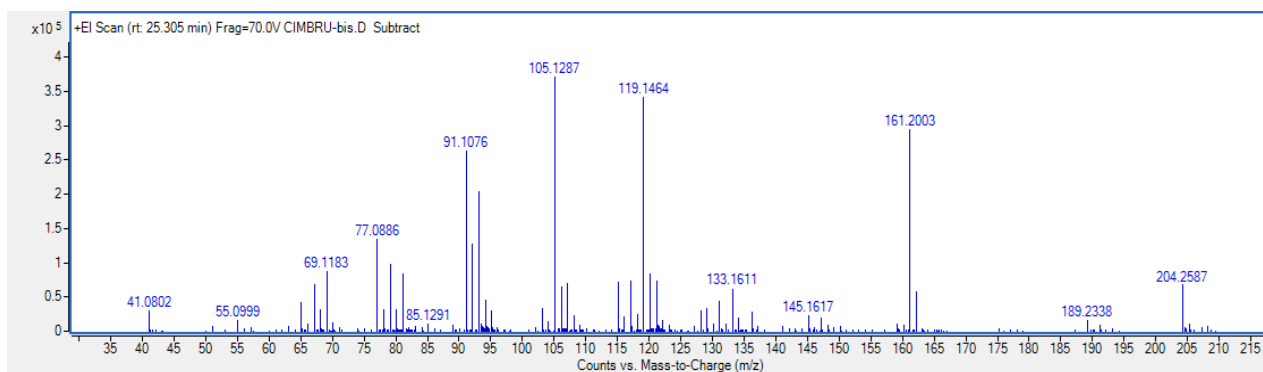

Figure S7.17: Mass spectrum for  $\alpha$ -copaene.

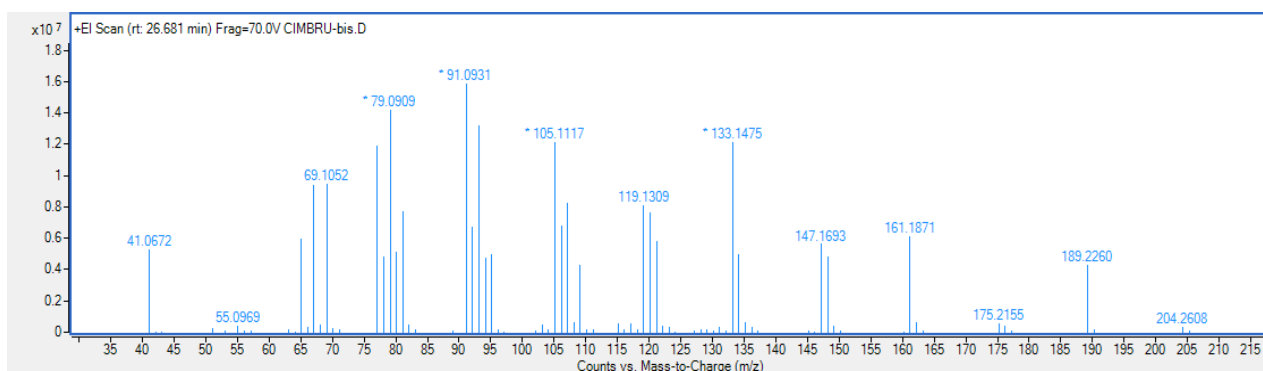

Figure S7.18: Mass spectrum for caryophyllene.

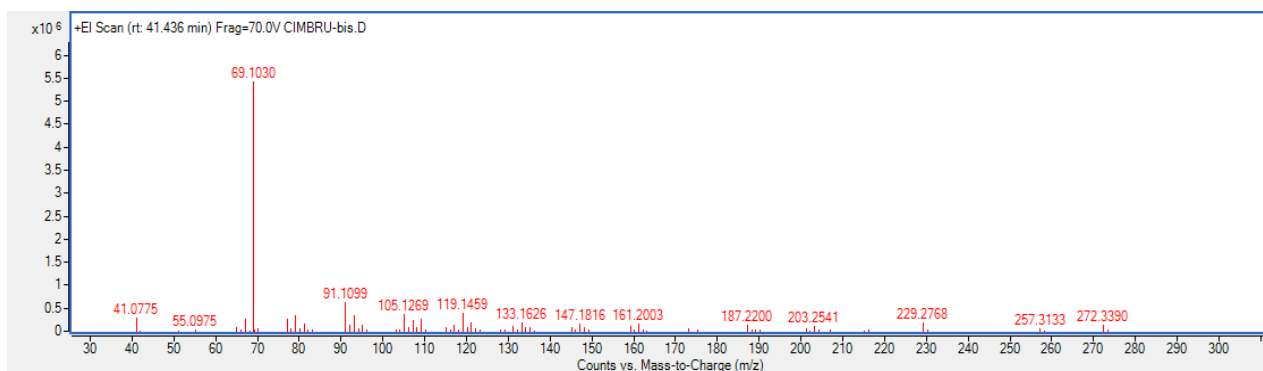

Figure S7.19: Mass spectrum for m-camphorene.

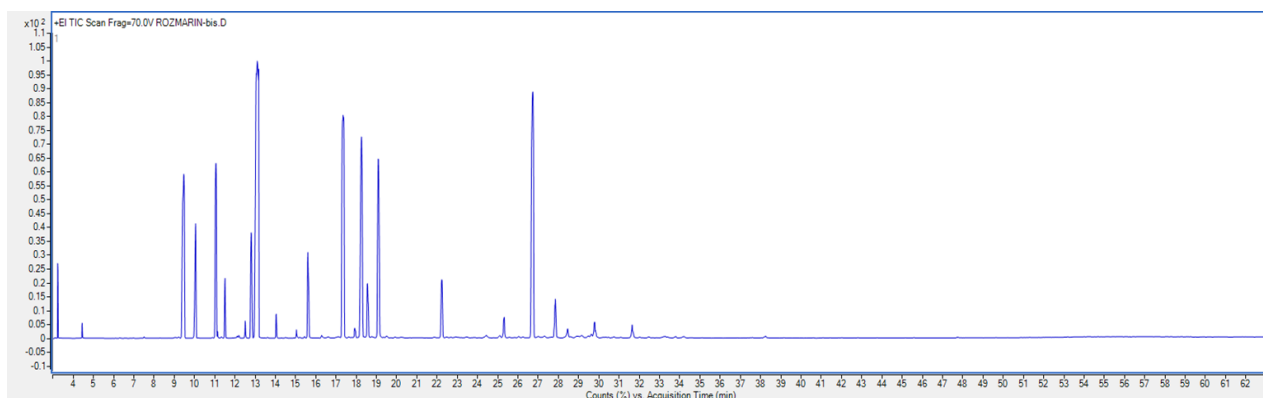

Figure S8: Chromatographic profile of the rosemary EO.

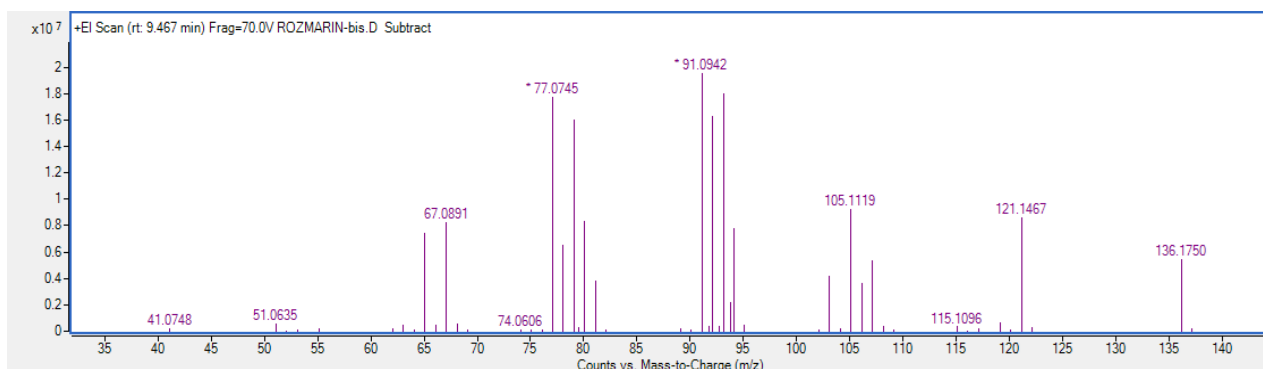

Figure S9.1: Mass spectrum for 3-carene.

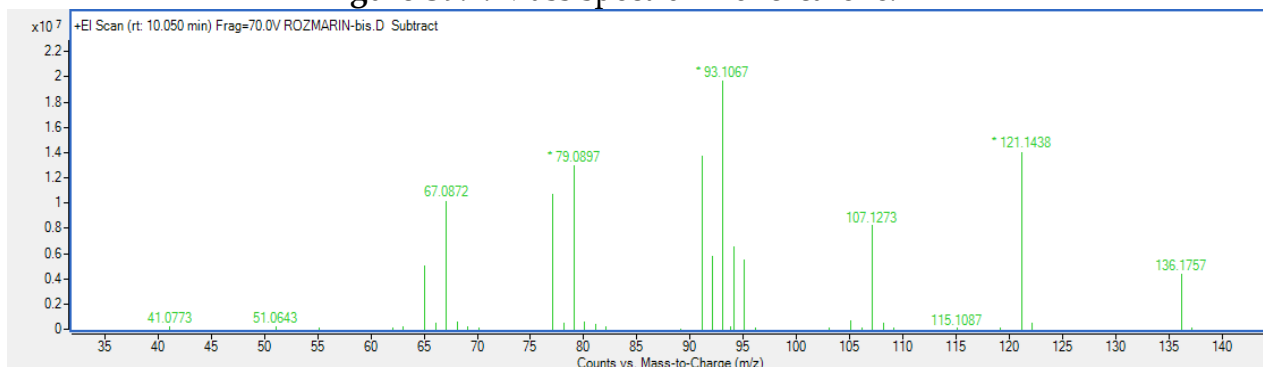

Figure S9.2: Mass spectrum for camphene.

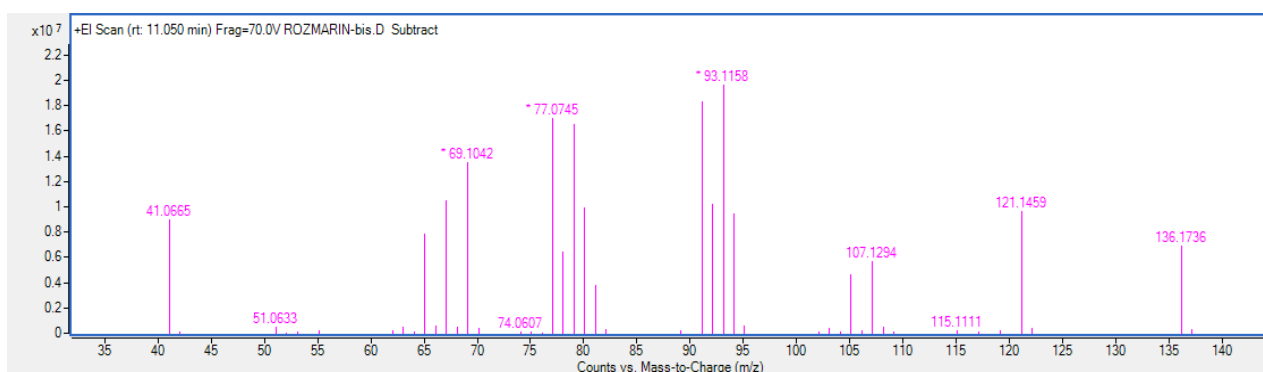

Figure S9.3: Mass spectrum for fenchene.

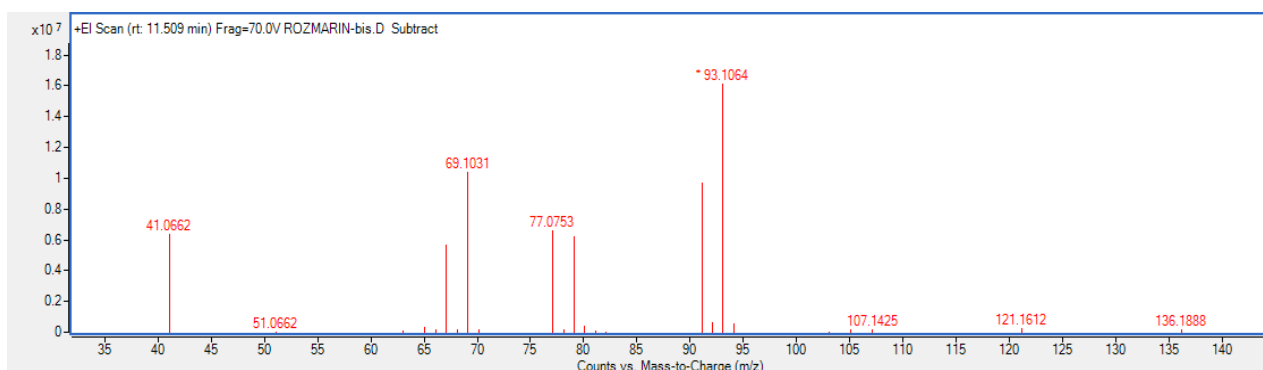

Figure S9.4: Mass spectrum for  $\beta$ -myrcene.

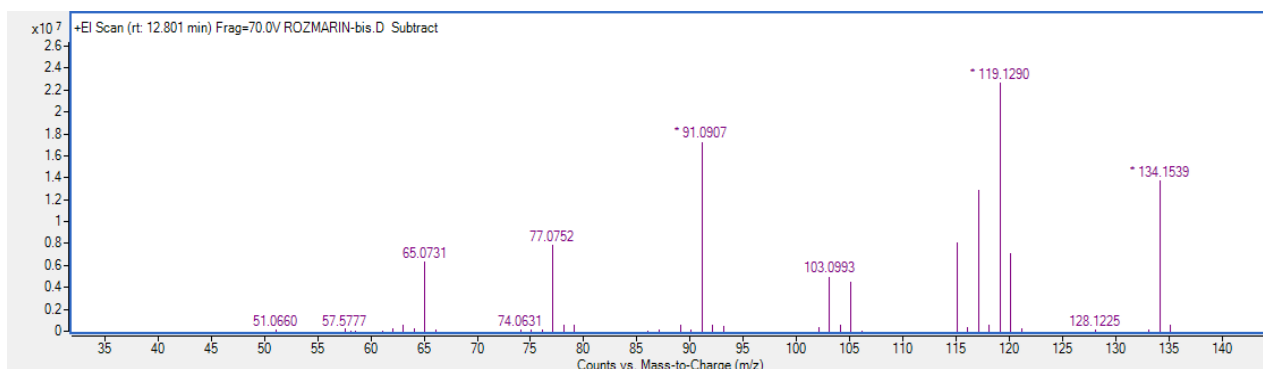

**Figure S9.5:** Mass spectrum for o-cymene.

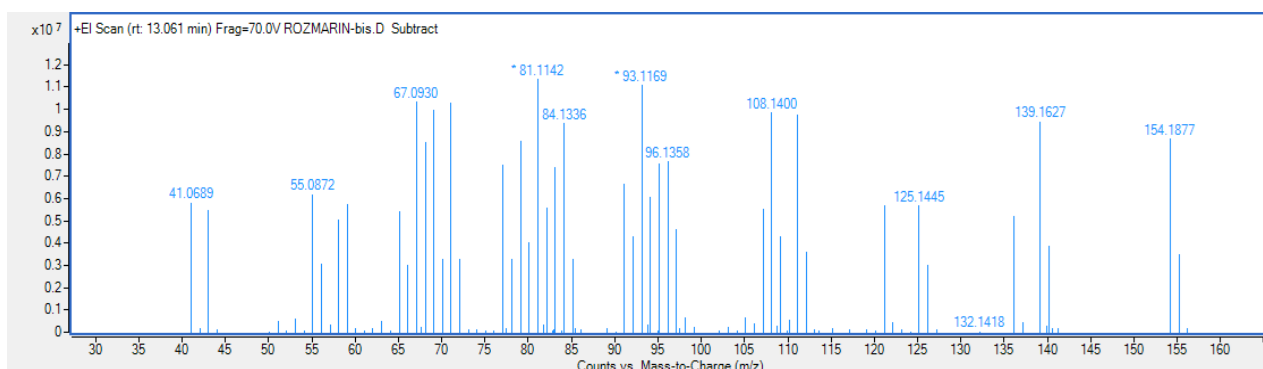

**Figure S9.6:** Mass spectrum for eucalyptol.

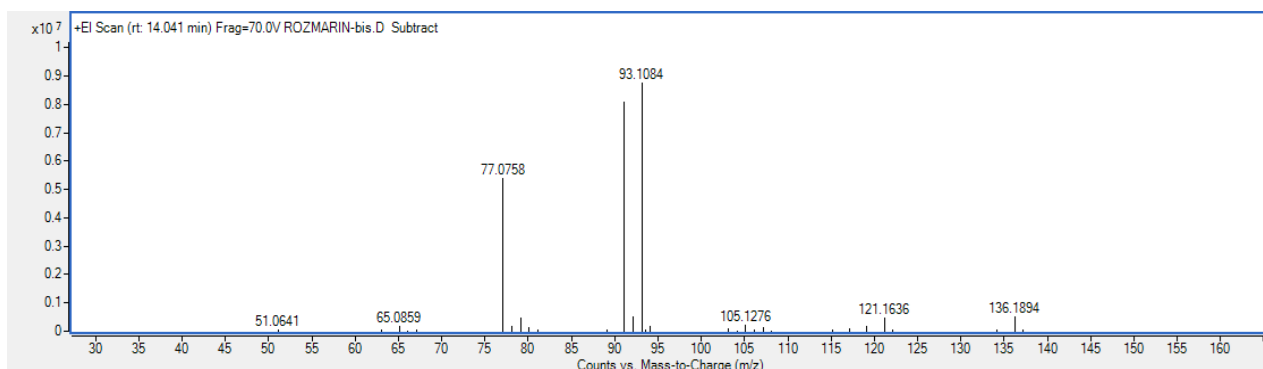

**Figure S9.7:** Mass spectrum for 3-thujene.

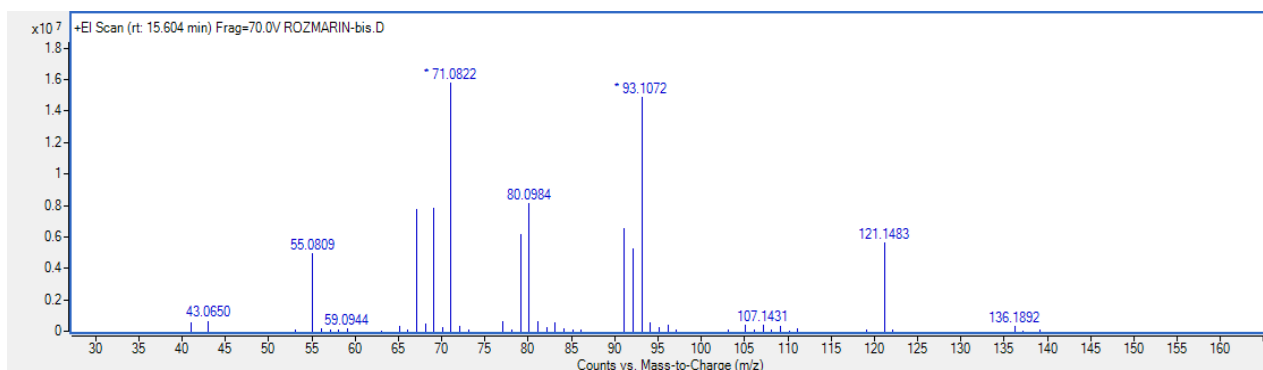

**Figure S9.8:** Mass spectrum for linalool.

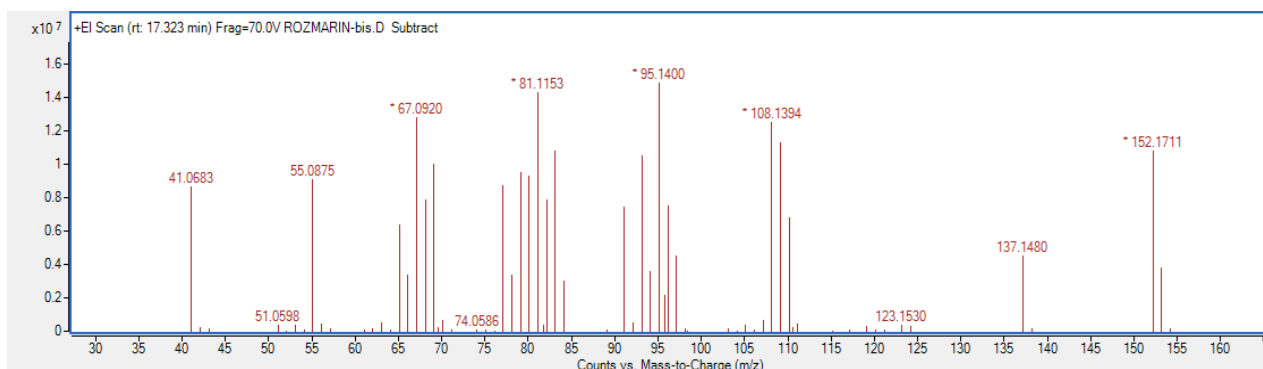

**Figure S9.9:** Mass spectrum for (+)-2-bornanone.

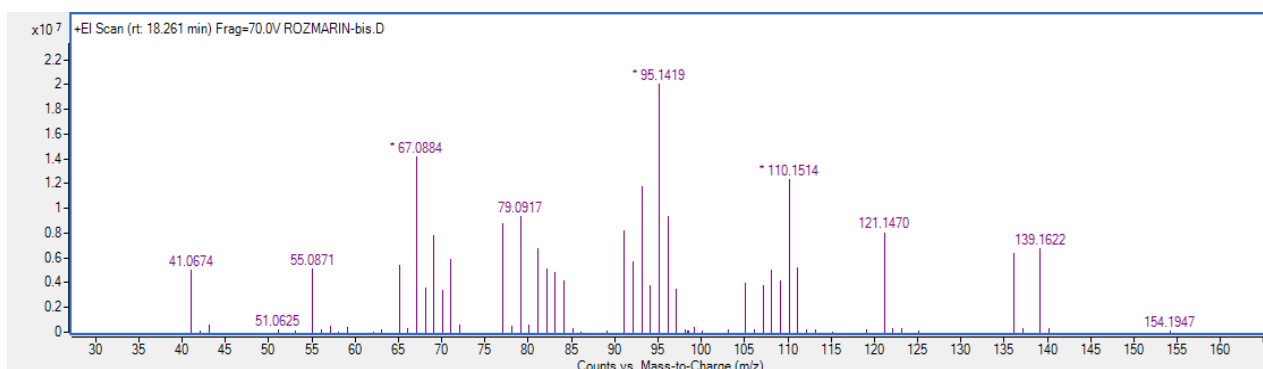

**Figure S9.10:** Mass spectrum for endo-borneol.

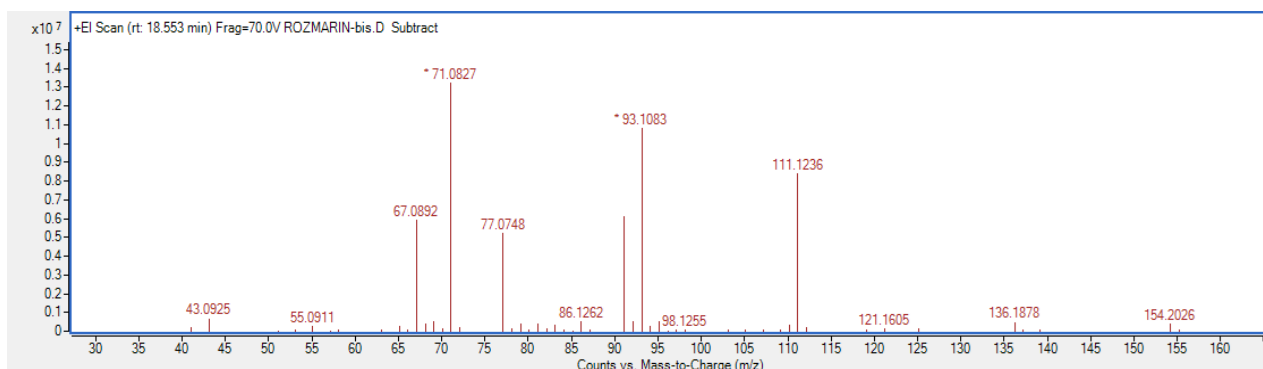

**Figure S9.11:** Mass spectrum for (-)-4-terpineol.

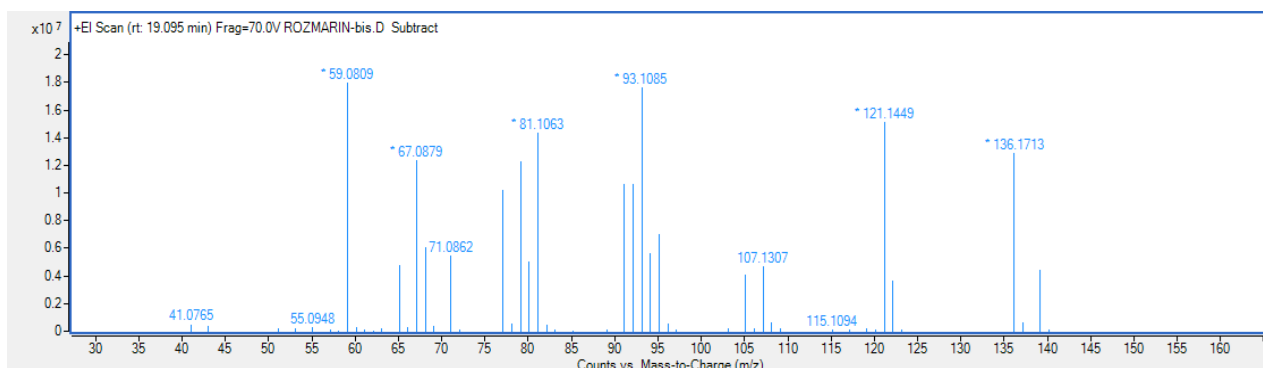

**Figure S9.12:** Mass spectrum for α-terpineol.

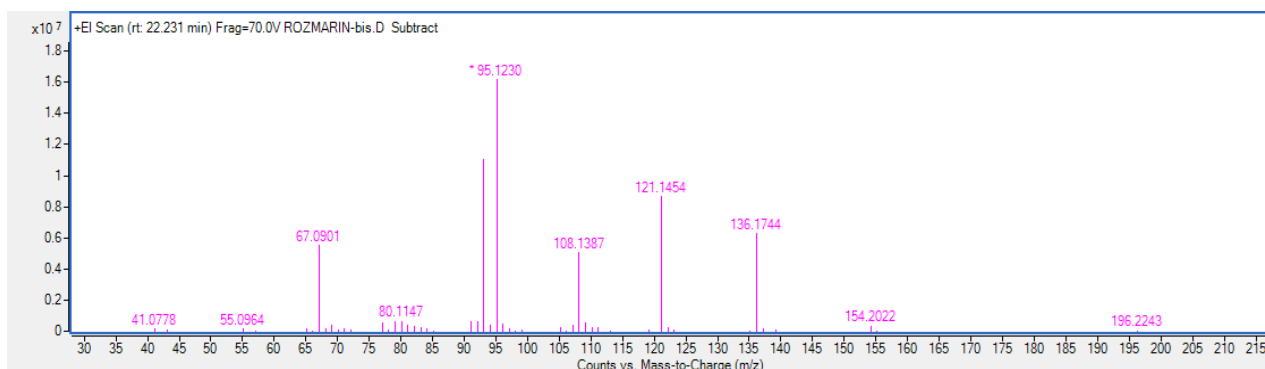

**Figure S9.13:** Mass spectrum for (-)-bornyl acetate.

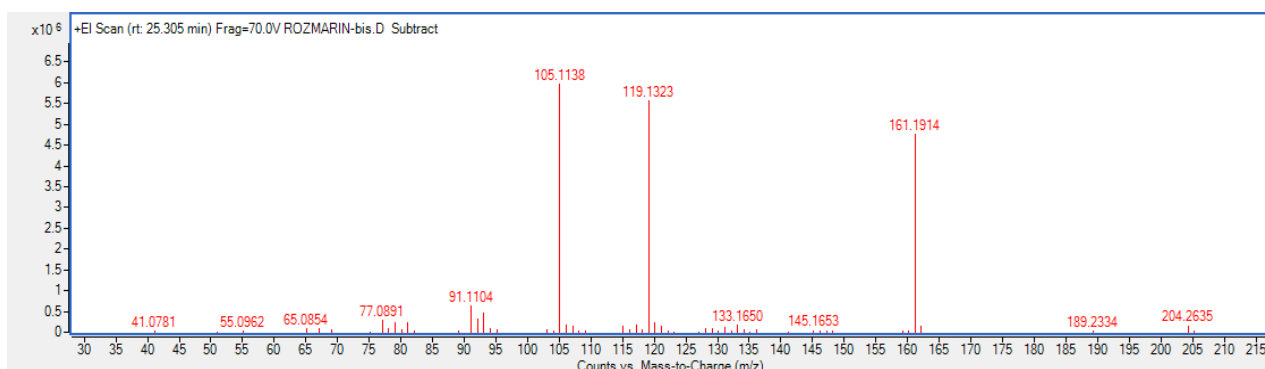

**Figure S9.14:** Mass spectrum for α-copaene.

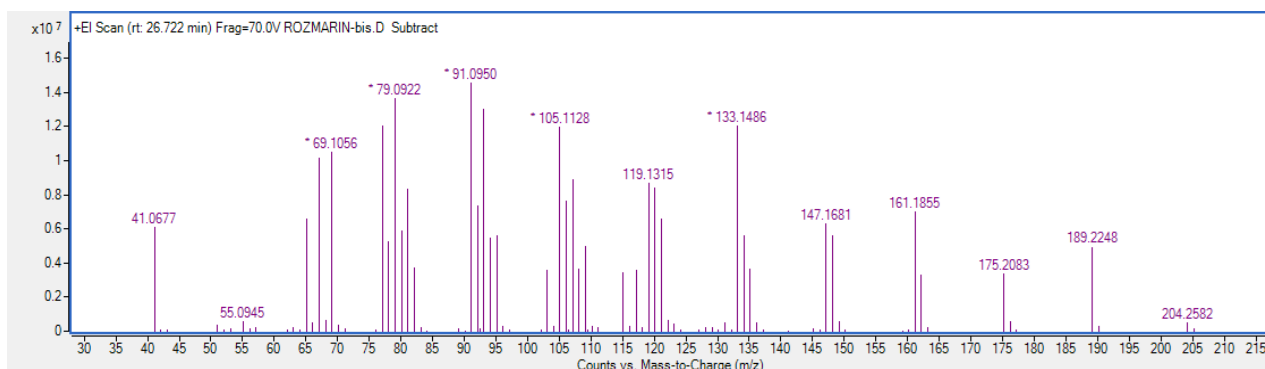

**Figure S9.15:** Mass spectrum for caryophyllene.

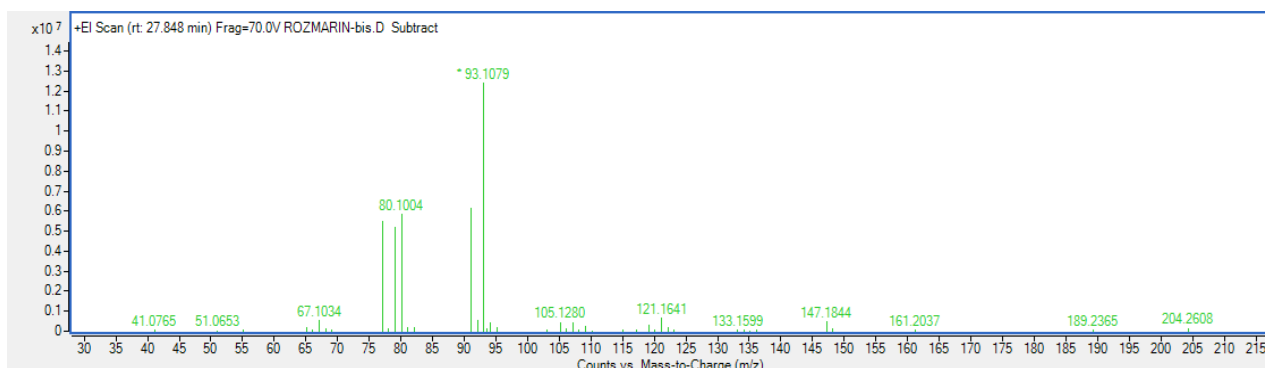

**Figure S9.16:** Mass spectrum for humulene.

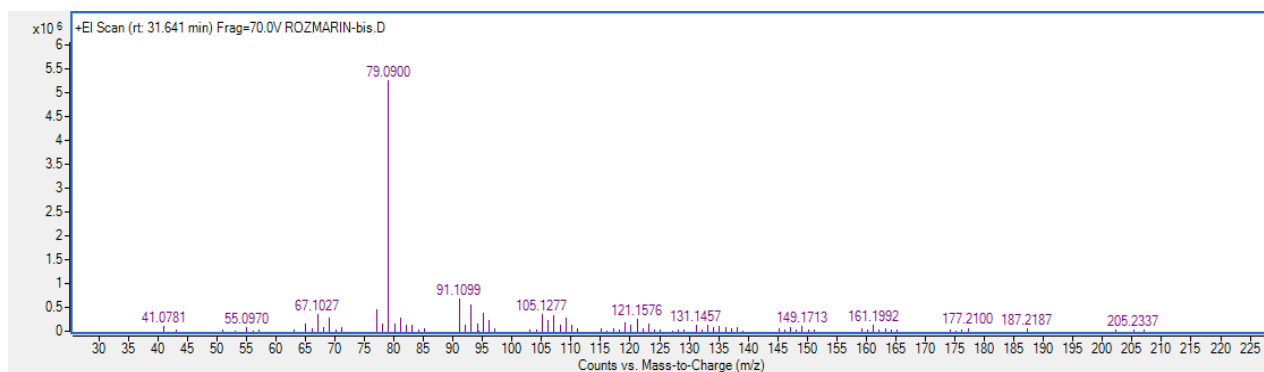

**Figure S9.17:** Mass spectrum for caryophyllene oxide.

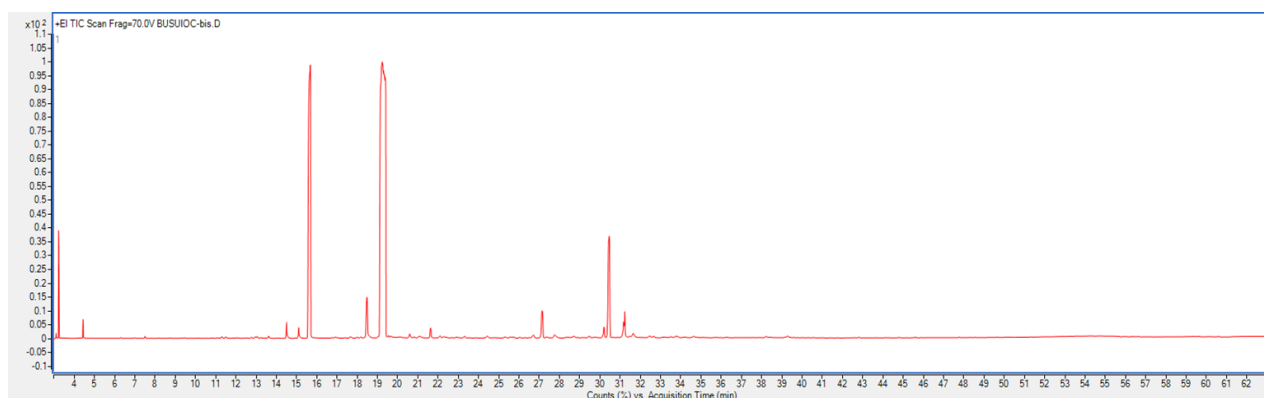

**Figure S10:** Chromatographic profile of the basil EO.

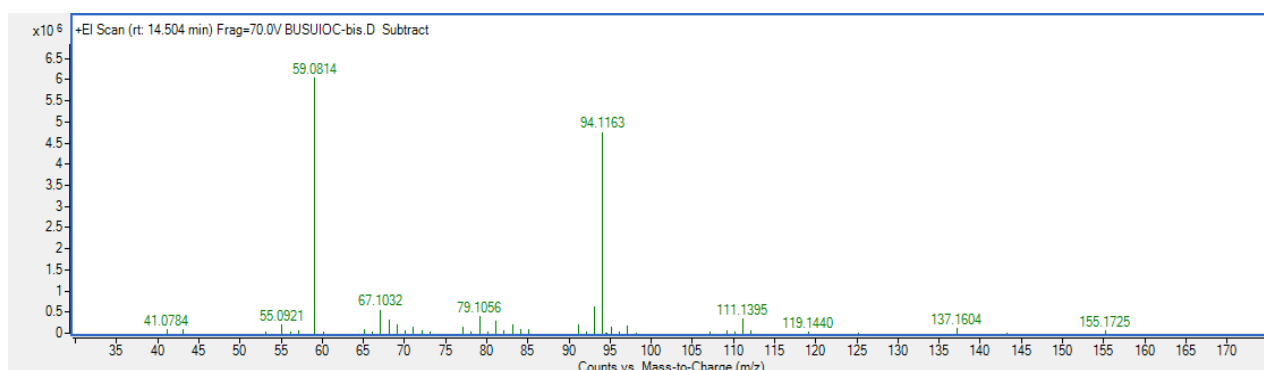

**Figure S11.1:** Mass spectrum for cis-linalool oxide.

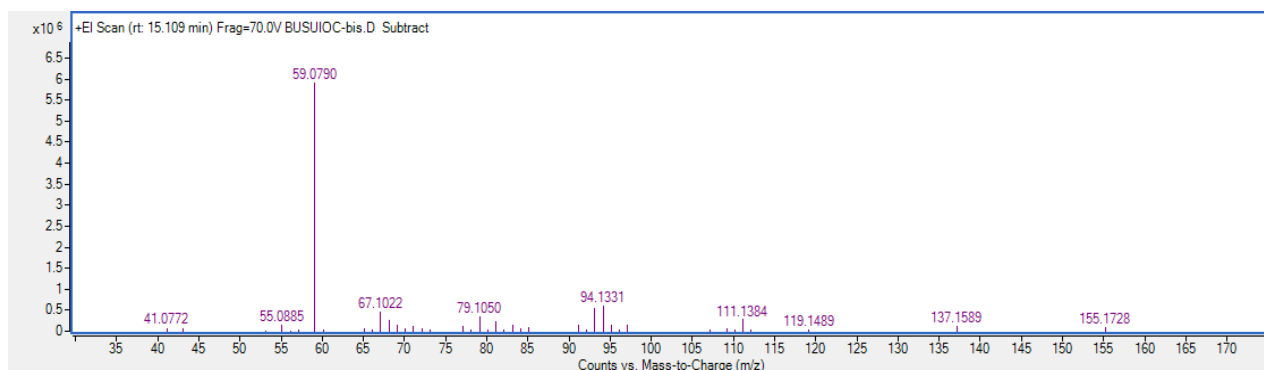

**Figure S11.2:** Mass spectrum for trans-linalool oxide.

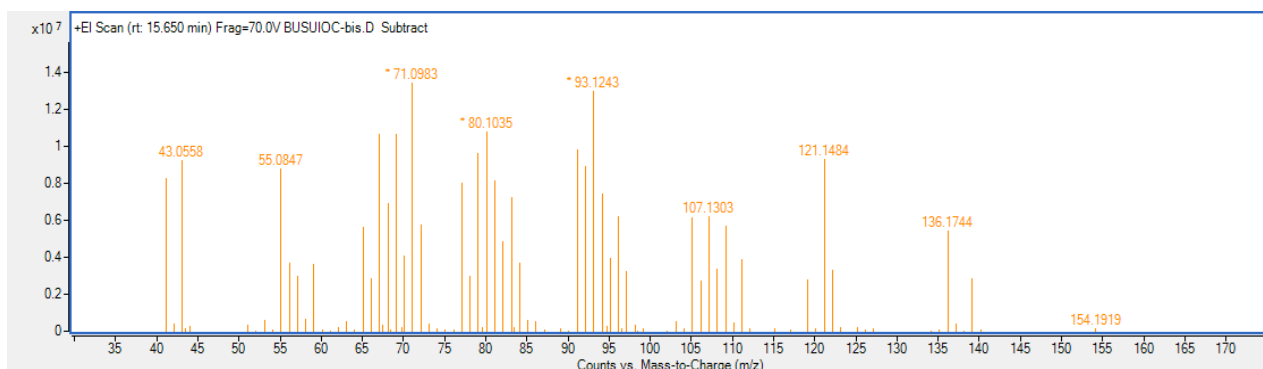

**Figure S11.3:** Mass spectrum for linalool.

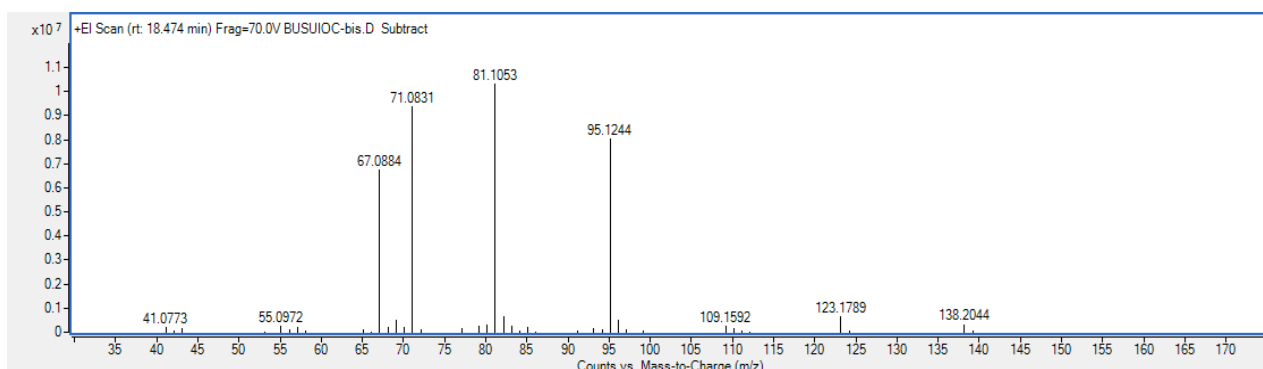

**Figure S11.4:** Mass spectrum for DL-menthol.

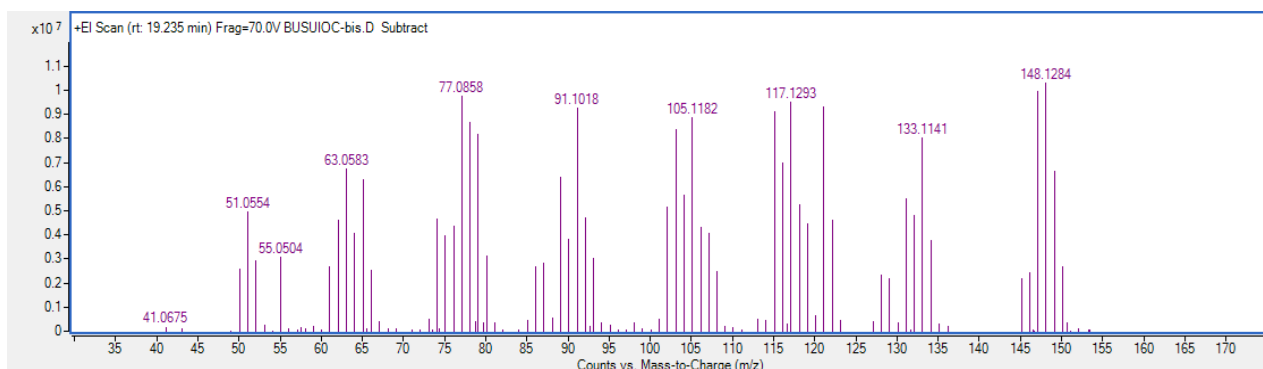

**Figure S11.5:** Mass spectrum for estragole.

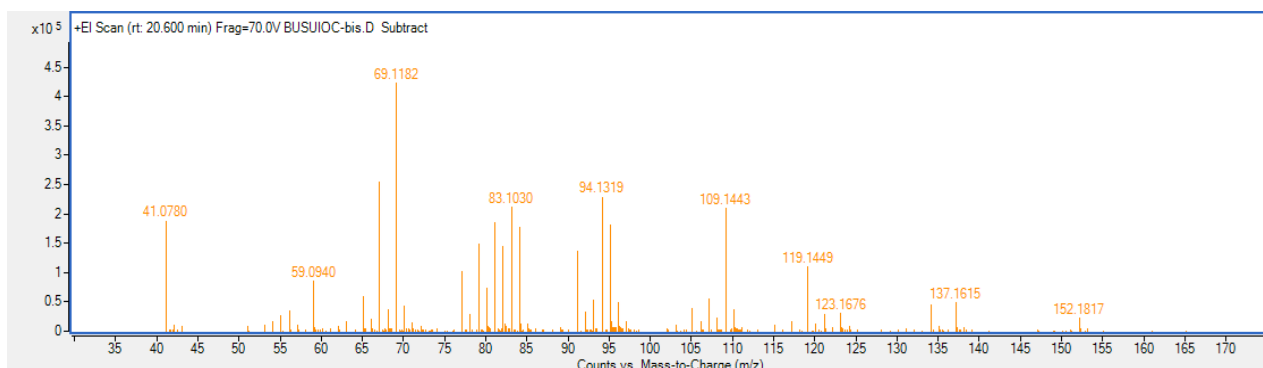

**Figure S11.6:** Mass spectrum for  $\beta$ -citral.

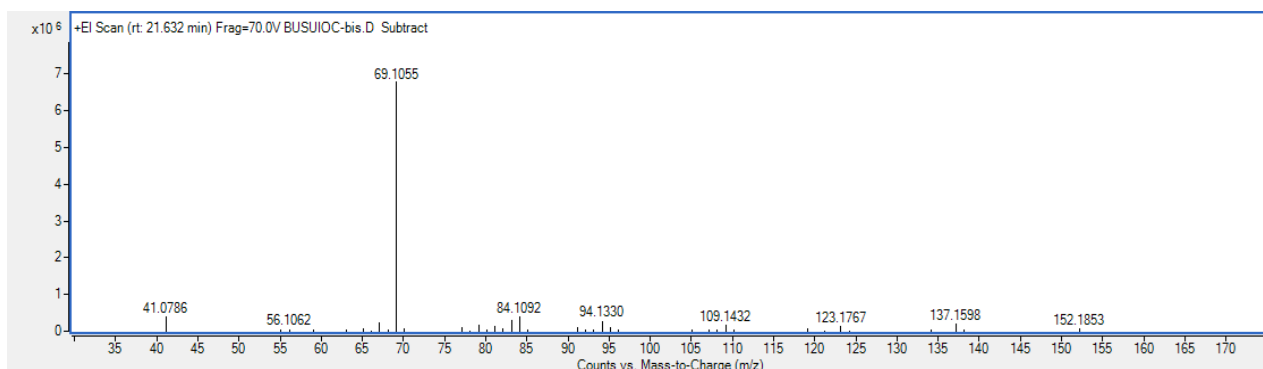

Figure S11.7: Mass spectrum for citral.

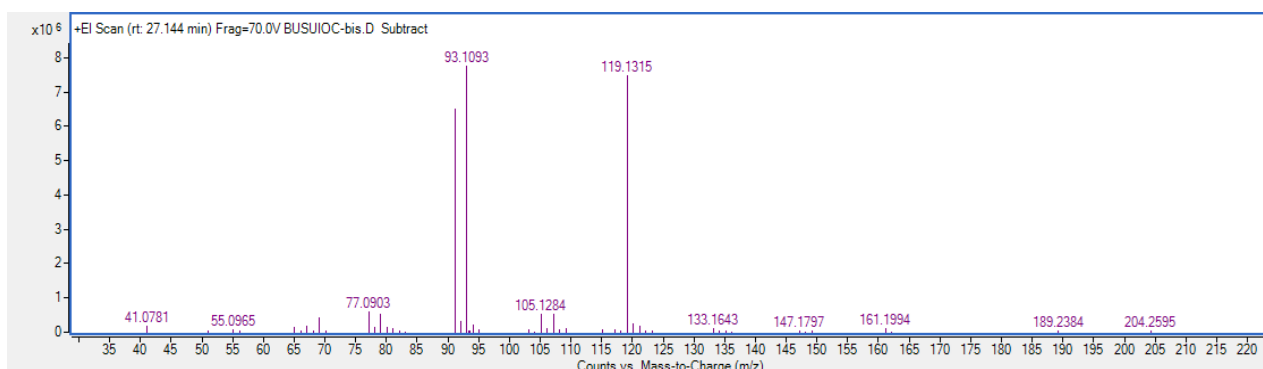

Figure S11.8: Mass spectrum for trans- $\alpha$ -bergamotene.

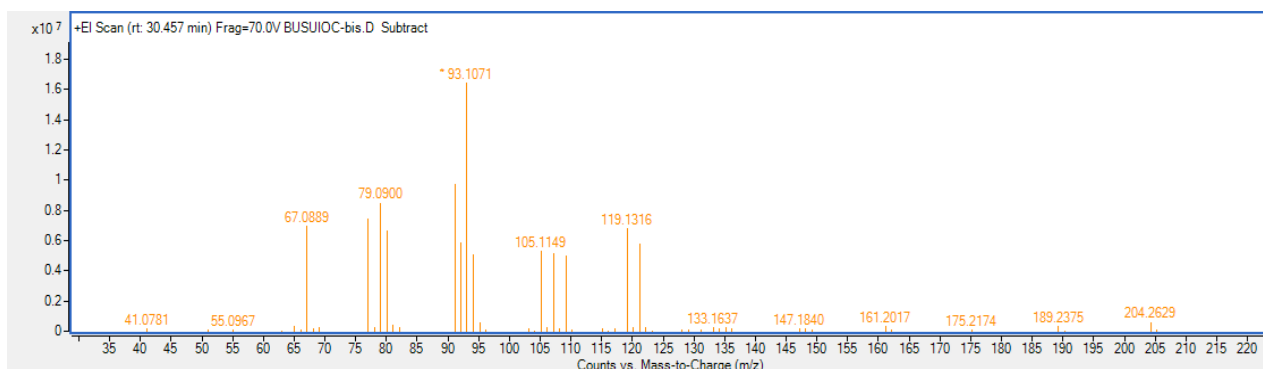

Figure S11.9: Mass spectrum for trans- $\alpha$ -bisabolene.

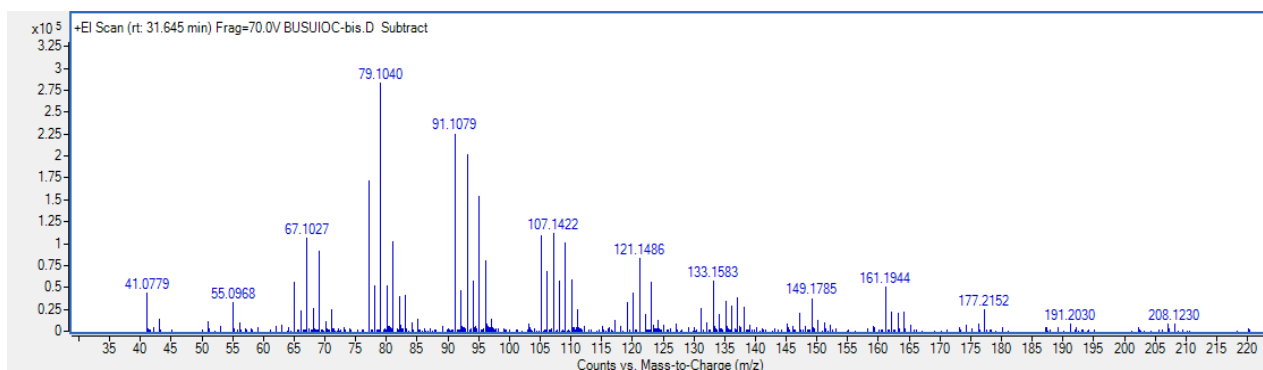

Figure S11.10: Mass spectrum for caryophyllene oxide.



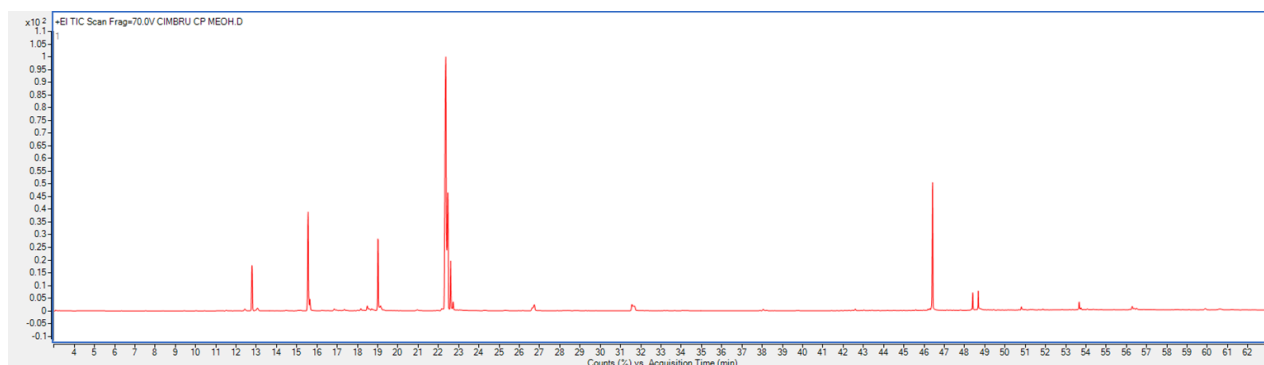

**Figure S12:** Chromatographic profile for Fe<sub>3</sub>O<sub>4</sub>@SiO<sub>2</sub>@thyme\_CP nanosystem (methanol).

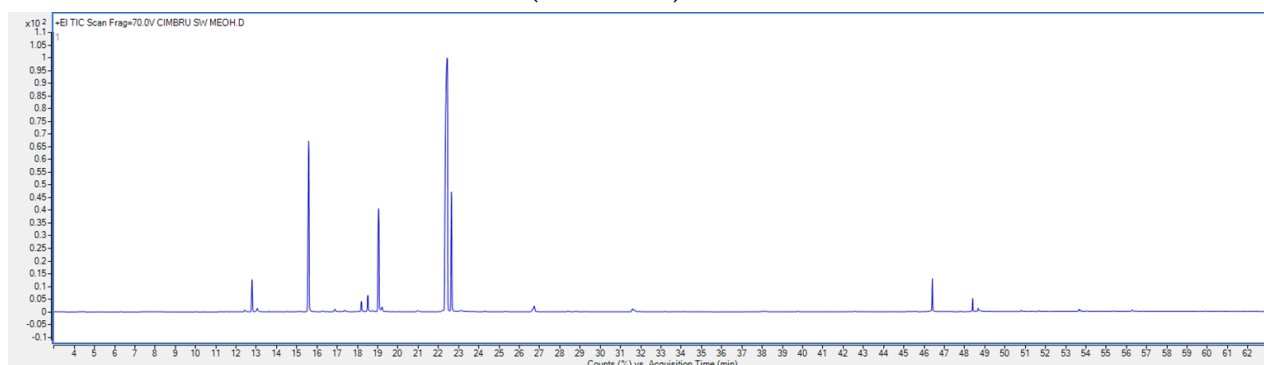

**Figure S13:** Chromatographic profile for Fe<sub>3</sub>O<sub>4</sub>@SiO<sub>2</sub>@thyme\_SW nanosystem (methanol).

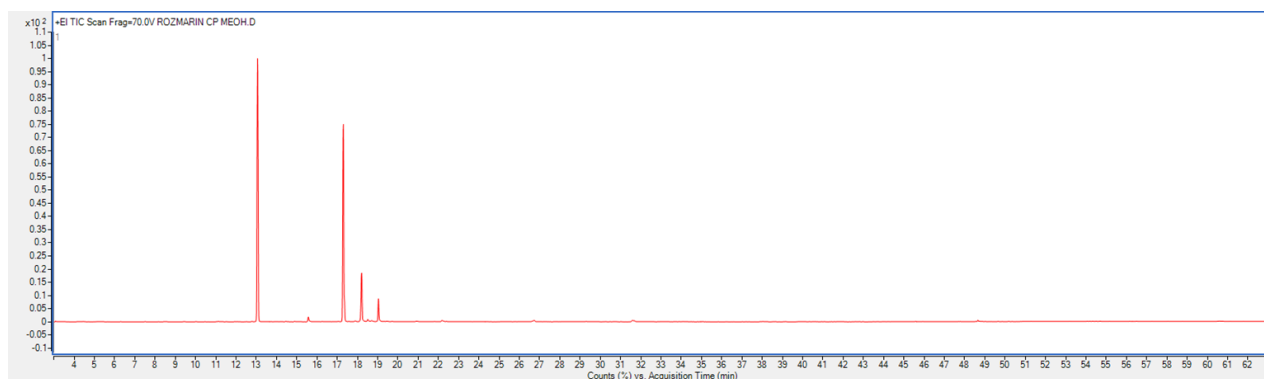

**Figure S14:** Chromatographic profile for Fe<sub>3</sub>O<sub>4</sub>@SiO<sub>2</sub>@rosemary\_CP nanosystem (methanol).

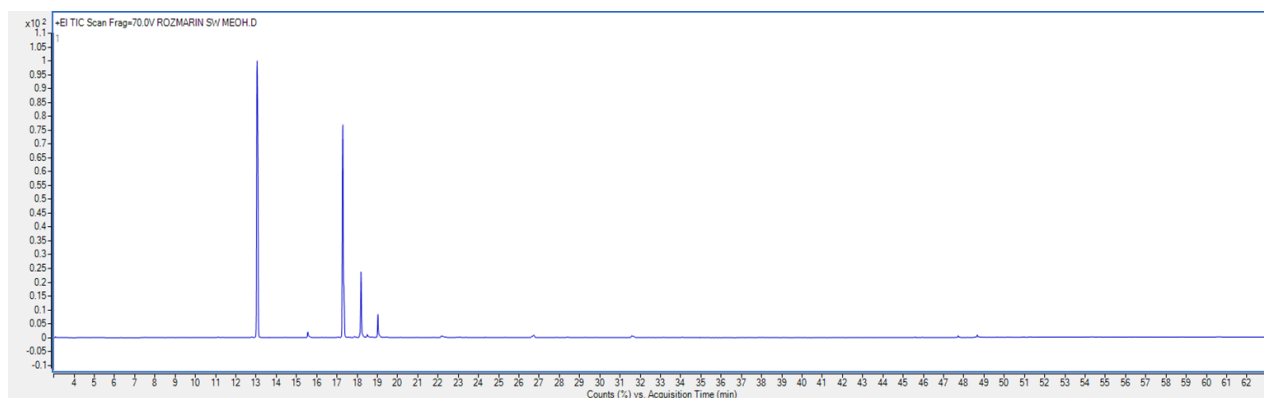

**Figure S15:** Chromatographic profile for Fe<sub>3</sub>O<sub>4</sub>@SiO<sub>2</sub>@rosemary\_SW nanosystem (methanol).

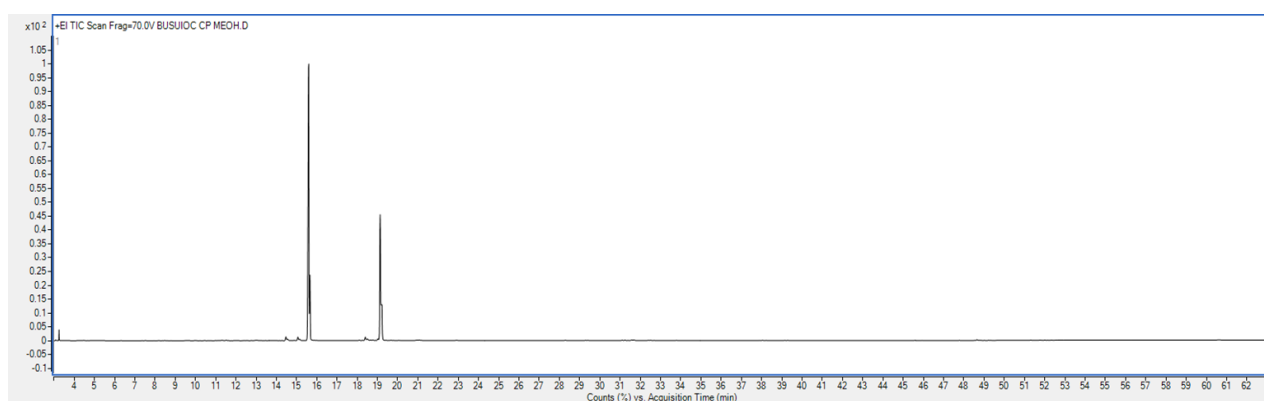

**Figure S16:** Chromatographic profile for Fe<sub>3</sub>O<sub>4</sub>@SiO<sub>2</sub>@basil\_CP nanosystem (methanol).

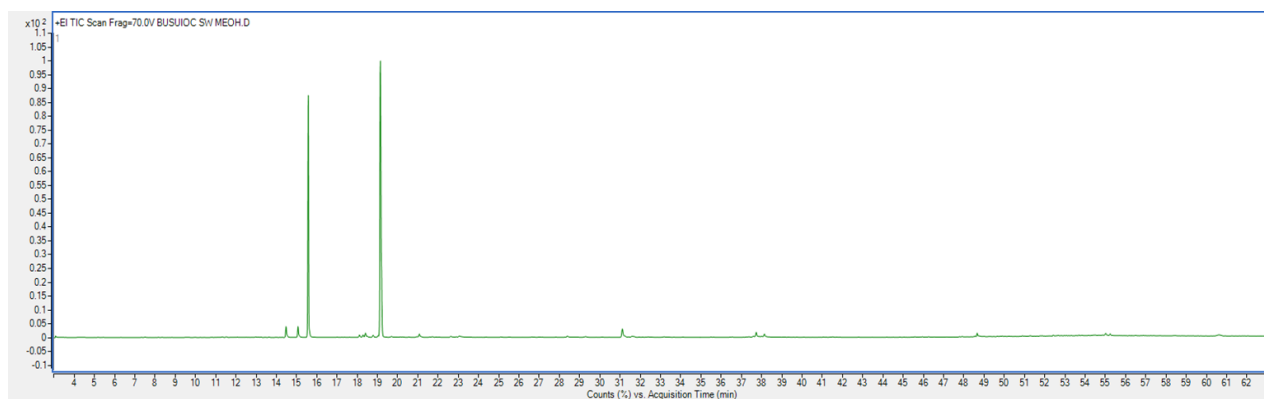

**Figure S17:** Chromatographic profile for Fe<sub>3</sub>O<sub>4</sub>@SiO<sub>2</sub>@basil\_SW nanosystem (methanol).
